# Supplementary material for: Transcriptional Memory-Like Imprints and Enhanced Functional Activity in γδ T Cells Following Resolution of Malaria Infection
Source: PubMed Central journal article supplement (PMC7591758; doi:10.3389/fimmu.2020.582358), 2020-10-14
Supplement: DataSheet_1.pdf [file DataSheet_1.pdf]

# Supplemental Figure 1

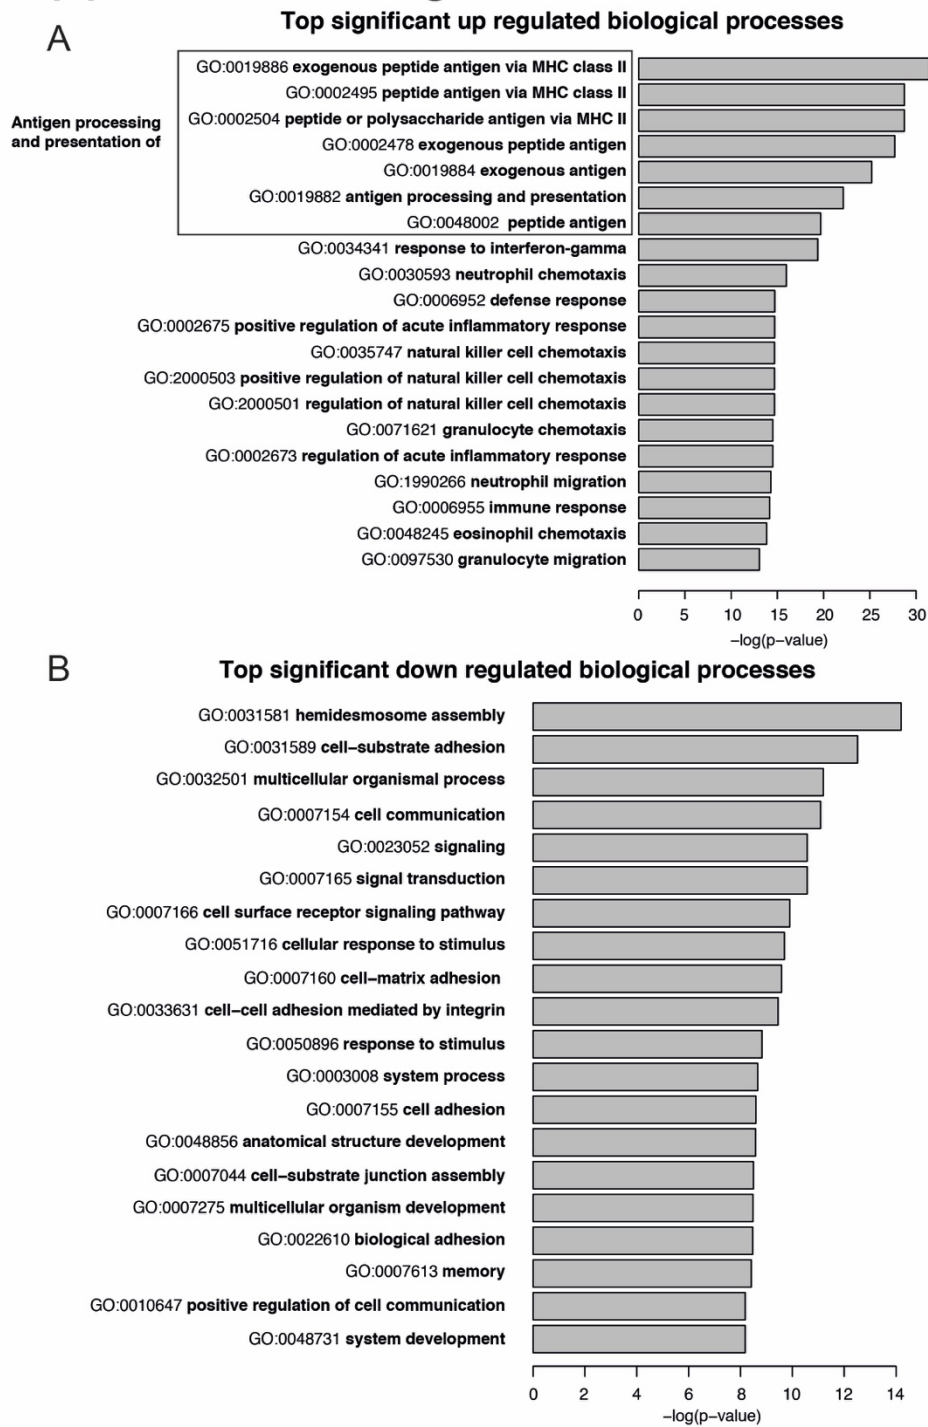

**Supplemental Figure 1. Pathway analysis of differentially expressed genes.** Gene Ontology (GO) terms for the differentially expressed genes were identified and the top 20 significantly A) upregulated and B) down regulated biological processes are presented.

## Supplemental Figure 2

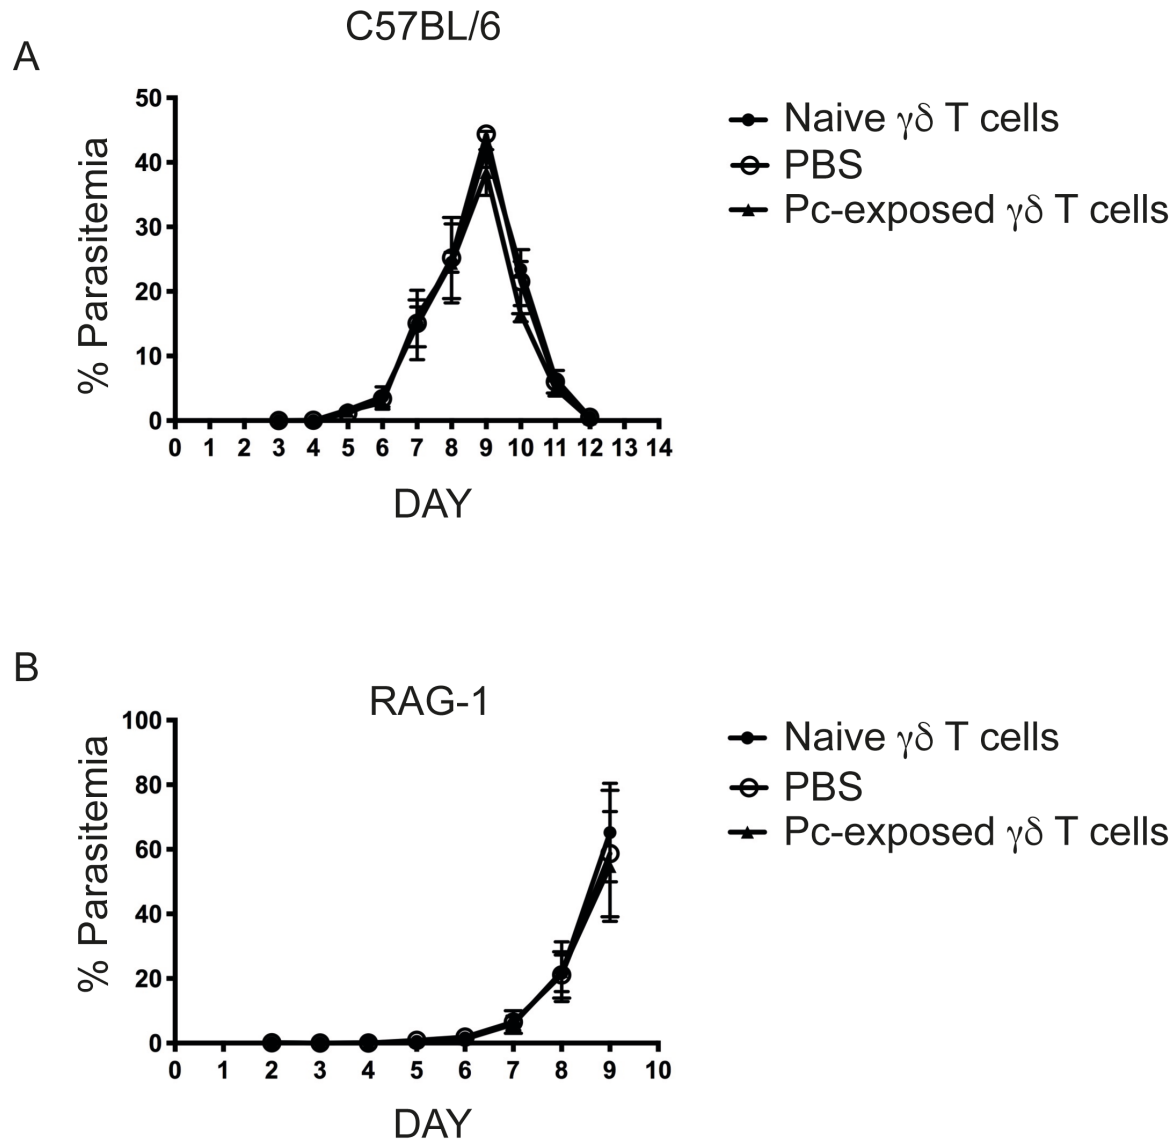

**Supplemental Figure 2. Parasitemia following adoptive transfer of *P. chabaudi*-exposed  $\gamma\delta$  T cells.**  $\gamma\delta$  T cells were isolated from spleens of naïve mice (filled circle) or *P. chabaudi*-exposed mice (filled triangle). These cells were then adoptively transferred into A) C57BL/6 mice (Naïve  $\gamma\delta$  T cells n=4, Pc-exposed  $\gamma\delta$  T cells n=4, PBS n=3) or B) RAG-1 mice ((Naïve  $\gamma\delta$  T cells n=7, Pc-exposed  $\gamma\delta$  T cells n=6, PBS n=8) 1 day post infection of recipient mice. Control mice received no cells, but were injected with PBS (open circles) 1 day post infection. Parasitemia was determined daily by thin blood smears. Statistical analysis was performed using Multiple t-tests, Holm-Sidak method.

## Supplemental Table 1. Differentially expressed genes in resting EM $\gamma\delta$ T cells for *P. chabaudi* exposed mice over naïve mice relative to a fold change threshold of 1.5.

| GeneID | Symbol       | logFC      | P.Value    | adj.P.Val  | GeneID    | Symbol      | logFC       | P.Value    | adj.P.Val  | GeneID    | Symbol      | logFC      | P.Value    | adj.P.Val  |
|--------|--------------|------------|------------|------------|-----------|-------------|-------------|------------|------------|-----------|-------------|------------|------------|------------|
| 16640  | Klra9        | 3.39044649 | 1.42E-08   | 0.00018394 | 12047     | Bcl2a1d     | 1.58363573  | 0.00016267 | 0.0220893  | 381605    | Tbc1d2      | -3.9868935 | 0.00062098 | 0.04341456 |
| 20302  | Ccl3         | 2.61819118 | 3.59E-08   | 0.00023202 | 546643    | I830127L07R | 2.64517731  | 0.00016386 | 0.0220893  | 100042335 | Rps15a-ps15 | 1.50810763 | 0.00062536 | 0.0438578  |
| 140919 | Sic17a6      | 8.58584287 | 1.29E-07   | 0.00055684 | 231380    | Uba6        | -1.9325607  | 0.00016425 | 0.0220893  | 230787    | Themis2     | 2.91912847 | 0.00063685 | 0.04378543 |
| 20303  | Ccl4         | 2.92039006 | 2.31E-07   | 0.00074802 | 20379     | Sfrp4       | 5.47280312  | 0.00016729 | 0.0220893  | 14130     | Fcgr2b      | 4.14352871 | 0.00064223 | 0.04378543 |
| 17181  | Matn2        | -3.0656979 | 7.88E-07   | 0.00175484 | 213498    | Arhgef11    | -2.4534256  | 0.00016883 | 0.0220893  | 633188    | Gm20762     | 1.53664557 | 0.00064238 | 0.04378543 |
| 20668  | Sox13        | -2.9775554 | 8.14E-07   | 0.00175484 | 19401     | Rara        | -1.64897025 | 0.00016945 | 0.0220893  | 100124677 | Tfrib13-3   | 1.88412132 | 0.00064321 | 0.04378543 |
| 14961  | H2-Ab1       | 3.34151569 | 1.29E-06   | 0.00209603 | 11958     | Atp5k       | 1.71041274  | 0.00017328 | 0.0220893  | 226519    | Lamc1       | -2.9979216 | 0.00066007 | 0.0451856  |
| 14969  | H2-Eb1       | 3.06629838 | 1.47E-06   | 0.00209603 | 547023    | Gm6014      | 1.59037474  | 0.00017408 | 0.0220893  | 73945     | Otus4       | -1.6303022 | 0.00066086 | 0.04451856 |
| 16638  | Klra8        | 3.39858743 | 1.58E-06   | 0.00209603 | 100038467 | A630072L19L | -3.1879796  | 0.00017412 | 0.0220893  | 100042173 | Rps15a-ps6  | 1.64503684 | 0.00066518 | 0.04457726 |
| 244233 | Cd163l1      | -3.6734629 | 1.63E-06   | 0.00209603 | 104759    | Plid4       | 2.23339953  | 0.0001742  | 0.0220893  | 14104     | Fasn        | -2.1972034 | 0.0006725  | 0.04483534 |
| 192897 | Irgb4        | -4.2356539 | 1.78E-06   | 0.00209603 | 20335     | Sec61g      | 1.71316333  | 0.00018335 | 0.02285935 | 66790     | Gm8451      | 1.6598696  | 0.0006883  | 0.04547373 |
| 104001 | Rtn1         | 6.32010768 | 2.01E-06   | 0.00210703 | 66141     | Iiftm3      | 3.1891748   | 0.00018393 | 0.02285935 | 16402     | Irga5       | -1.8821888 | 0.00068999 | 0.04547373 |
| 320712 | Abi3bp       | -2.687706  | 2.24E-06   | 0.00210703 | 16963     | Xcl1        | 1.67046898  | 0.00018558 | 0.02285935 | 20602     | Ncor2       | -1.9287641 | 0.00069262 | 0.04547373 |
| 14960  | H2-Aa        | 3.74438646 | 2.28E-06   | 0.00210703 | 333789    | N4bp2       | -2.1499791  | 0.00020016 | 0.0244229  | 242202    | Pde5a       | -1.6322369 | 0.00069731 | 0.04555069 |
| 67971  | Tppp3        | -3.3576541 | 3.87E-06   | 0.00333899 | 93736     | Aff4        | -1.6704461  | 0.00020374 | 0.02462745 | 11690     | Alox5ap     | 3.92836672 | 0.00070132 | 0.04558242 |
| 67784  | Phnd1        | -3.6726208 | 5.56E-06   | 0.00445659 | 18636     | Ctp         | 2.5068855   | 0.00021903 | 0.0261136  | 213121    | Ankrd35     | -2.7322028 | 0.00072014 | 0.0465715  |
| 76933  | Hfz72a       | 1.9771099  | 5.86E-06   | 0.00445659 | 19724     | Rbx1        | -1.7988245  | 0.00022007 | 0.0261136  | 319565    | Syne2       | -1.6112692 | 0.00073176 | 0.04683652 |
| 16149  | Cd74         | 2.9311707  | 7.00E-06   | 0.00484936 | 99031     | Oxlp6       | -5.4399794  | 0.00022644 | 0.02650221 | 100416706 | Zfp729b     | -1.5515733 | 0.00073552 | 0.04683652 |
| 16407  | Iltgae       | -1.9508531 | 7.15E-06   | 0.00484936 | 242474    | Tmem245     | -1.9398074  | 0.00022926 | 0.02650221 | 19861     | Rnu30a      | 1.65181887 | 0.00073906 | 0.04683652 |
| 16525  | Kcnk1        | -2.2320014 | 7.98E-06   | 0.00484936 | 105203    | Fam208b     | -2.1364652  | 0.00022949 | 0.02650221 | 19941     | Rpl26       | 1.45725058 | 0.00073872 | 0.04683652 |
| 108105 | R3gnt5       | -2.1318702 | 8.00E-06   | 0.00484936 | 14419     | Gal         | 5.23497664  | 0.00023627 | 0.02703276 | 268670    | Zfp759      | -3.0108621 | 0.00078001 | 0.04914534 |
| 75124  | Nxn1l        | -3.9675443 | 8.25E-06   | 0.00484936 | 27278     | Clnk        | -3.1480376  | 0.00023855 | 0.02703276 | 11941     | Atp2b2      | 3.6400329  | 0.00078303 | 0.04914534 |
| 64074  | Smoc2        | 3.22005352 | 9.93E-06   | 0.00558654 | 106064    | AW549877    | -1.4559389  | 0.00024242 | 0.02703276 | 16909     | Lmo2        | 2.9502143  | 0.00078654 | 0.04914534 |
| 320940 | Atp11c       | -3.0596644 | 1.18E-05   | 0.0063155  | 58800     | Trpm7       | -1.6515186  | 0.00024546 | 0.02703276 | 57890     | Il17re      | -1.4806967 | 0.00079281 | 0.04929907 |
| 14127  | Fcer1g       | 2.28114455 | 1.22E-05   | 0.0063155  | 100114901 | Trdv4       | -3.1632699  | 0.00024666 | 0.02703276 | 74002     | Psd2        | -3.1439883 | 0.00079855 | 0.04941853 |
| 22700  | Zfp40        | -2.8183597 | 1.34E-05   | 0.00667617 | 546336    | Prrg1       | -3.7274869  | 0.00024663 | 0.02703276 | 100134990 | Selenocp1   | 1.71535575 | 0.00080446 | 0.04954681 |
| 16628  | Klra10       | 3.17360354 | 1.52E-05   | 0.00728868 | 100042480 | Nhs1d2      | -2.3384695  | 0.00024908 | 0.02707175 | 19850     | Rnu3a       | 2.22061571 | 0.00081795 | 0.0499763  |
| 56620  | Clec4n       | 5.47291964 | 1.61E-05   | 0.00737075 | 70882     | Armc3       | 2.09645514  | 0.00025411 | 0.02738847 | 226641    | Atf6        | -1.767882  | 0.00082072 | 0.0499763  |
| 16728  | L1cam        | -2.6150969 | 1.70E-05   | 0.00737075 | 212281    | Zfp729a     | -1.8037739  | 0.00026404 | 0.02822362 | 100039988 | Gm11826     | 1.85151395 | 0.00082302 | 0.0499763  |
| 16177  | Il1r1        | -3.0255573 | 1.71E-05   | 0.00737075 | 11305     | Abca2       | -2.1059443  | 0.00026962 | 0.02849805 |           |             |            |            |            |
| 94180  | Acsb1        | -2.1520114 | 1.78E-05   | 0.00742548 | 80876     | Ifitm2      | 4.33771     | 0.00027444 | 0.02849805 |           |             |            |            |            |
| 434179 | Zfp975       | -2.7566189 | 1.93E-05   | 0.00781934 | 18798     | Pibca4      | -1.8991147  | 0.00027573 | 0.02849805 |           |             |            |            |            |
| 12143  | Btk          | -2.0813922 | 2.03E-05   | 0.00786837 | 668548    | Gm9234      | 1.5886041   | 0.00027762 | 0.02849805 |           |             |            |            |            |
| 109689 | Arrb1        | -2.4470744 | 2.12E-05   | 0.00786837 | 19942     | Rpl27       | 1.49528932  | 0.0002779  | 0.02849805 |           |             |            |            |            |
| 105298 | Epdrl        | 2.29149016 | 2.13E-05   | 0.00786837 | 13848     | Ephb6       | -2.1407699  | 0.0002806  | 0.02849805 |           |             |            |            |            |
| 66857  | Pibd1        | 3.1880755  | 2.23E-05   | 0.00800138 | 623286    | Gm6415      | 1.73980233  | 0.00028276 | 0.02849805 |           |             |            |            |            |
| 27403  | Abca7        | -2.2961181 | 2.44E-05   | 0.00853689 | 64380     | Ms4a4c      | 1.56184576  | 0.0002846  | 0.02849805 |           |             |            |            |            |
| 19225  | Ptgs2        | 5.48449503 | 2.92E-05   | 0.00951065 | 18799     | Plcd1       | -2.9029124  | 0.00028877 | 0.02849805 |           |             |            |            |            |
| 240034 | Zfp760       | -2.6778093 | 2.94E-05   | 0.00951065 | 232157    | Mob1a       | -1.8235198  | 0.00029138 | 0.02849805 |           |             |            |            |            |
| 20304  | Ccl5         | 1.80542457 | 2.94E-05   | 0.00951065 | 100310809 | Gm10509     | -1.9455024  | 0.00029467 | 0.02849805 |           |             |            |            |            |
| 12959  | Cryba4       | -3.1216169 | 3.33E-05   | 0.0104986  | 85030     | Tnfrsf25    | 1.5834613   | 0.00029471 | 0.02849805 |           |             |            |            |            |
| 217169 | Tms4         | -3.4001073 | 3.66E-05   | 0.0111969  | 20874     | Sik         | -1.6840805  | 0.00029525 | 0.02849805 |           |             |            |            |            |
| 320832 | Sirp1a1a     | 4.11075448 | 3.72E-05   | 0.0111969  | 80876     | Ifitm2      | 3.33823857  | 0.00030793 | 0.02936592 |           |             |            |            |            |
| 15000  | H2-DMb2      | 3.4752987  | 4.52E-05   | 0.01299018 | 70747     | Tspan2      | -3.1933786  | 0.00031025 | 0.02936592 |           |             |            |            |            |
| 217166 | Nr1d1        | -1.8385267 | 4.55E-05   | 0.01299018 | 217344    | Rhbdf2      | -1.9191638  | 0.00031105 | 0.02936592 |           |             |            |            |            |
| 23833  | Cd52         | 1.54680848 | 4.62E-05   | 0.01299018 | 17970     | Ncf2        | 2.34277338  | 0.00032008 | 0.02985542 |           |             |            |            |            |
| 480868 | Zfp738       | -2.231938  | 5.04E-05   | 0.01382819 | 74206     | Sipa1l3     | -2.870379   | 0.00032085 | 0.02985542 |           |             |            |            |            |
| 20441  | St3gal3      | -2.4250712 | 5.16E-05   | 0.01382819 | 57295     | Icmt        | -2.7002589  | 0.00032518 | 0.03004208 |           |             |            |            |            |
| 16541  | Napsa        | 1.82045567 | 5.24E-05   | 0.01382819 | 103012    | Firre       | -2.885473   | 0.00033104 | 0.03036672 |           |             |            |            |            |
| 73218  | Sppl2b       | -1.9845924 | 5.47E-05   | 0.01415938 | 235682    | Zfp445      | -1.6368334  | 0.00033843 | 0.03065132 |           |             |            |            |            |
| 22177  | Tyrobp       | 2.0377819  | 5.85E-05   | 0.01470045 | 664903    | Rps15a-ps4  | 1.52584779  | 0.00033889 | 0.03065132 |           |             |            |            |            |
| 69623  | Zfp33b       | -2.2383166 | 6.00E-05   | 0.01470045 | 71679     | Atp5h       | 1.46354865  | 0.00034347 | 0.03085009 |           |             |            |            |            |
| 327957 | Scamp        | 2.36750583 | 6.24E-05   | 0.01470045 | 595139    | E030024N20  | 1.9564233   | 0.00035041 | 0.03105678 |           |             |            |            |            |
| 231507 | Plac8        | 2.10617985 | 6.26E-05   | 0.01470045 | 54127     | Rps28       | 1.63489106  | 0.00035057 | 0.03105678 |           |             |            |            |            |
| 27375  | Tjp3         | -1.9661036 | 6.27E-05   | 0.01470045 | 442834    | D830031N03  | -5.6264778  | 0.00035118 | 0.03160264 |           |             |            |            |            |
| 188310 | Plec         | -2.0152577 | 6.45E-05   | 0.01470045 | 232286    | Tmf1        | -1.841913   | 0.00037438 | 0.03271751 |           |             |            |            |            |
| 13924  | Ptprv        | -2.1715927 | 6.55E-05   | 0.01470045 | 209590    | Il23r       | -1.5742096  | 0.00038148 | 0.03311473 |           |             |            |            |            |
| 52673  | D13ErtDf608e | 6.07348703 | 6.59E-05   | 0.01470045 | 14255     | Flt3        | 3.93307654  | 0.00039181 | 0.03343625 |           |             |            |            |            |
| 105844 | Card10       | -2.6295919 | 6.85E-05   | 0.0147293  | 68052     | Rps13       | 1.52797482  | 0.00039619 | 0.03343625 |           |             |            |            |            |
| 16449  | Jag1         | -2.2705059 | 6.91E-05   | 0.0147293  | 76486     | Ly6k        | 2.43981225  | 0.00039855 | 0.03343625 |           |             |            |            |            |
| 26888  | Clec4a2      | 7.36981245 | 6.95E-05   | 0.0147293  | 56318     | Acpp        | -1.7027226  | 0.00039856 | 0.03343625 |           |             |            |            |            |
| 11828  | Aqp3         | -1.9149296 | 7.31E-05   | 0.0150935  | 233115    | Dpy1913     | -1.8132615  | 0.00039868 | 0.03343625 |           |             |            |            |            |
| 72310  | Nkg7         | 1.49537211 | 7.35E-05   | 0.0150935  | 244234    | 5830411N06  | -1.8919018  | 0.00040359 | 0.03343625 |           |             |            |            |            |
| 227737 | Fam129b      | -2.4930972 | 7.68E-05   | 0.01551876 | 14710     | Gngt2       | 1.59211673  | 0.00040515 | 0.03343625 |           |             |            |            |            |
| 16419  | Irgb5        | -2.518283  | 8.26E-05   | 0.01635881 | 226691    | Ifi207      | 4.14276731  | 0.00040587 | 0.03343625 |           |             |            |            |            |
| 240407 | Mmp25        | -2.021048  | 8.35E-05   | 0.01635881 | 14934     | Gypa        | 4.47460481  | 0.00042532 | 0.03481664 |           |             |            |            |            |
| 68836  | Mrip152      | 1.71245827 | 8.63E-05   | 0.0165606  | 27762     | Vwa7        | -3.8726915  | 0.00044147 | 0.03564666 |           |             |            |            |            |
| 677296 | Fcrl6        | 2.52556764 | 9.08E-05   | 0.01714184 | 100217422 | Snomr13     | 2.4390167   | 0.00044415 | 0.03564666 |           |             |            |            |            |
| 76089  | Ragef2       | -2.4179422 | 9.26E-05   | 0.01714184 | 70081     | Zfp995      | -2.0314871  | 0.0004466  | 0.03564666 |           |             |            |            |            |
| 14999  | H2-DMb1      | 2.6663498  | 9.30E-05   | 0.01714184 | 11798     | Xiap        | -1.8115982  | 0.0004494  | 0.03564666 |           |             |            |            |            |
| 235627 | Nbeal2       | -2.2397522 | 9.41E-05   | 0.01714184 | 240753    | Plekha6     | -3.2662489  | 0.00044954 | 0.03564666 |           |             |            |            |            |
| 13590  | Lefty1       | 3.91201824 | 9.83E-05   | 0.01766426 | 66475     | Rps23       | 1.53622924  | 0.00045199 | 0.03564666 |           |             |            |            |            |
| 15978  | Irfng        | 1.54412634 | 0.00010009 | 0.01773421 | 218850    | Fam208a     | -1.7662213  | 0.000470   |            |           |             |            |            |            |
